# Supplementary material for: Diversification of defensins and NLRs in Arabidopsis species by different evolutionary mechanisms
Source: PubMed Central journal article supplement (PMC5731061; doi:10.1186/s12862-017-1099-4), 2017-12-15

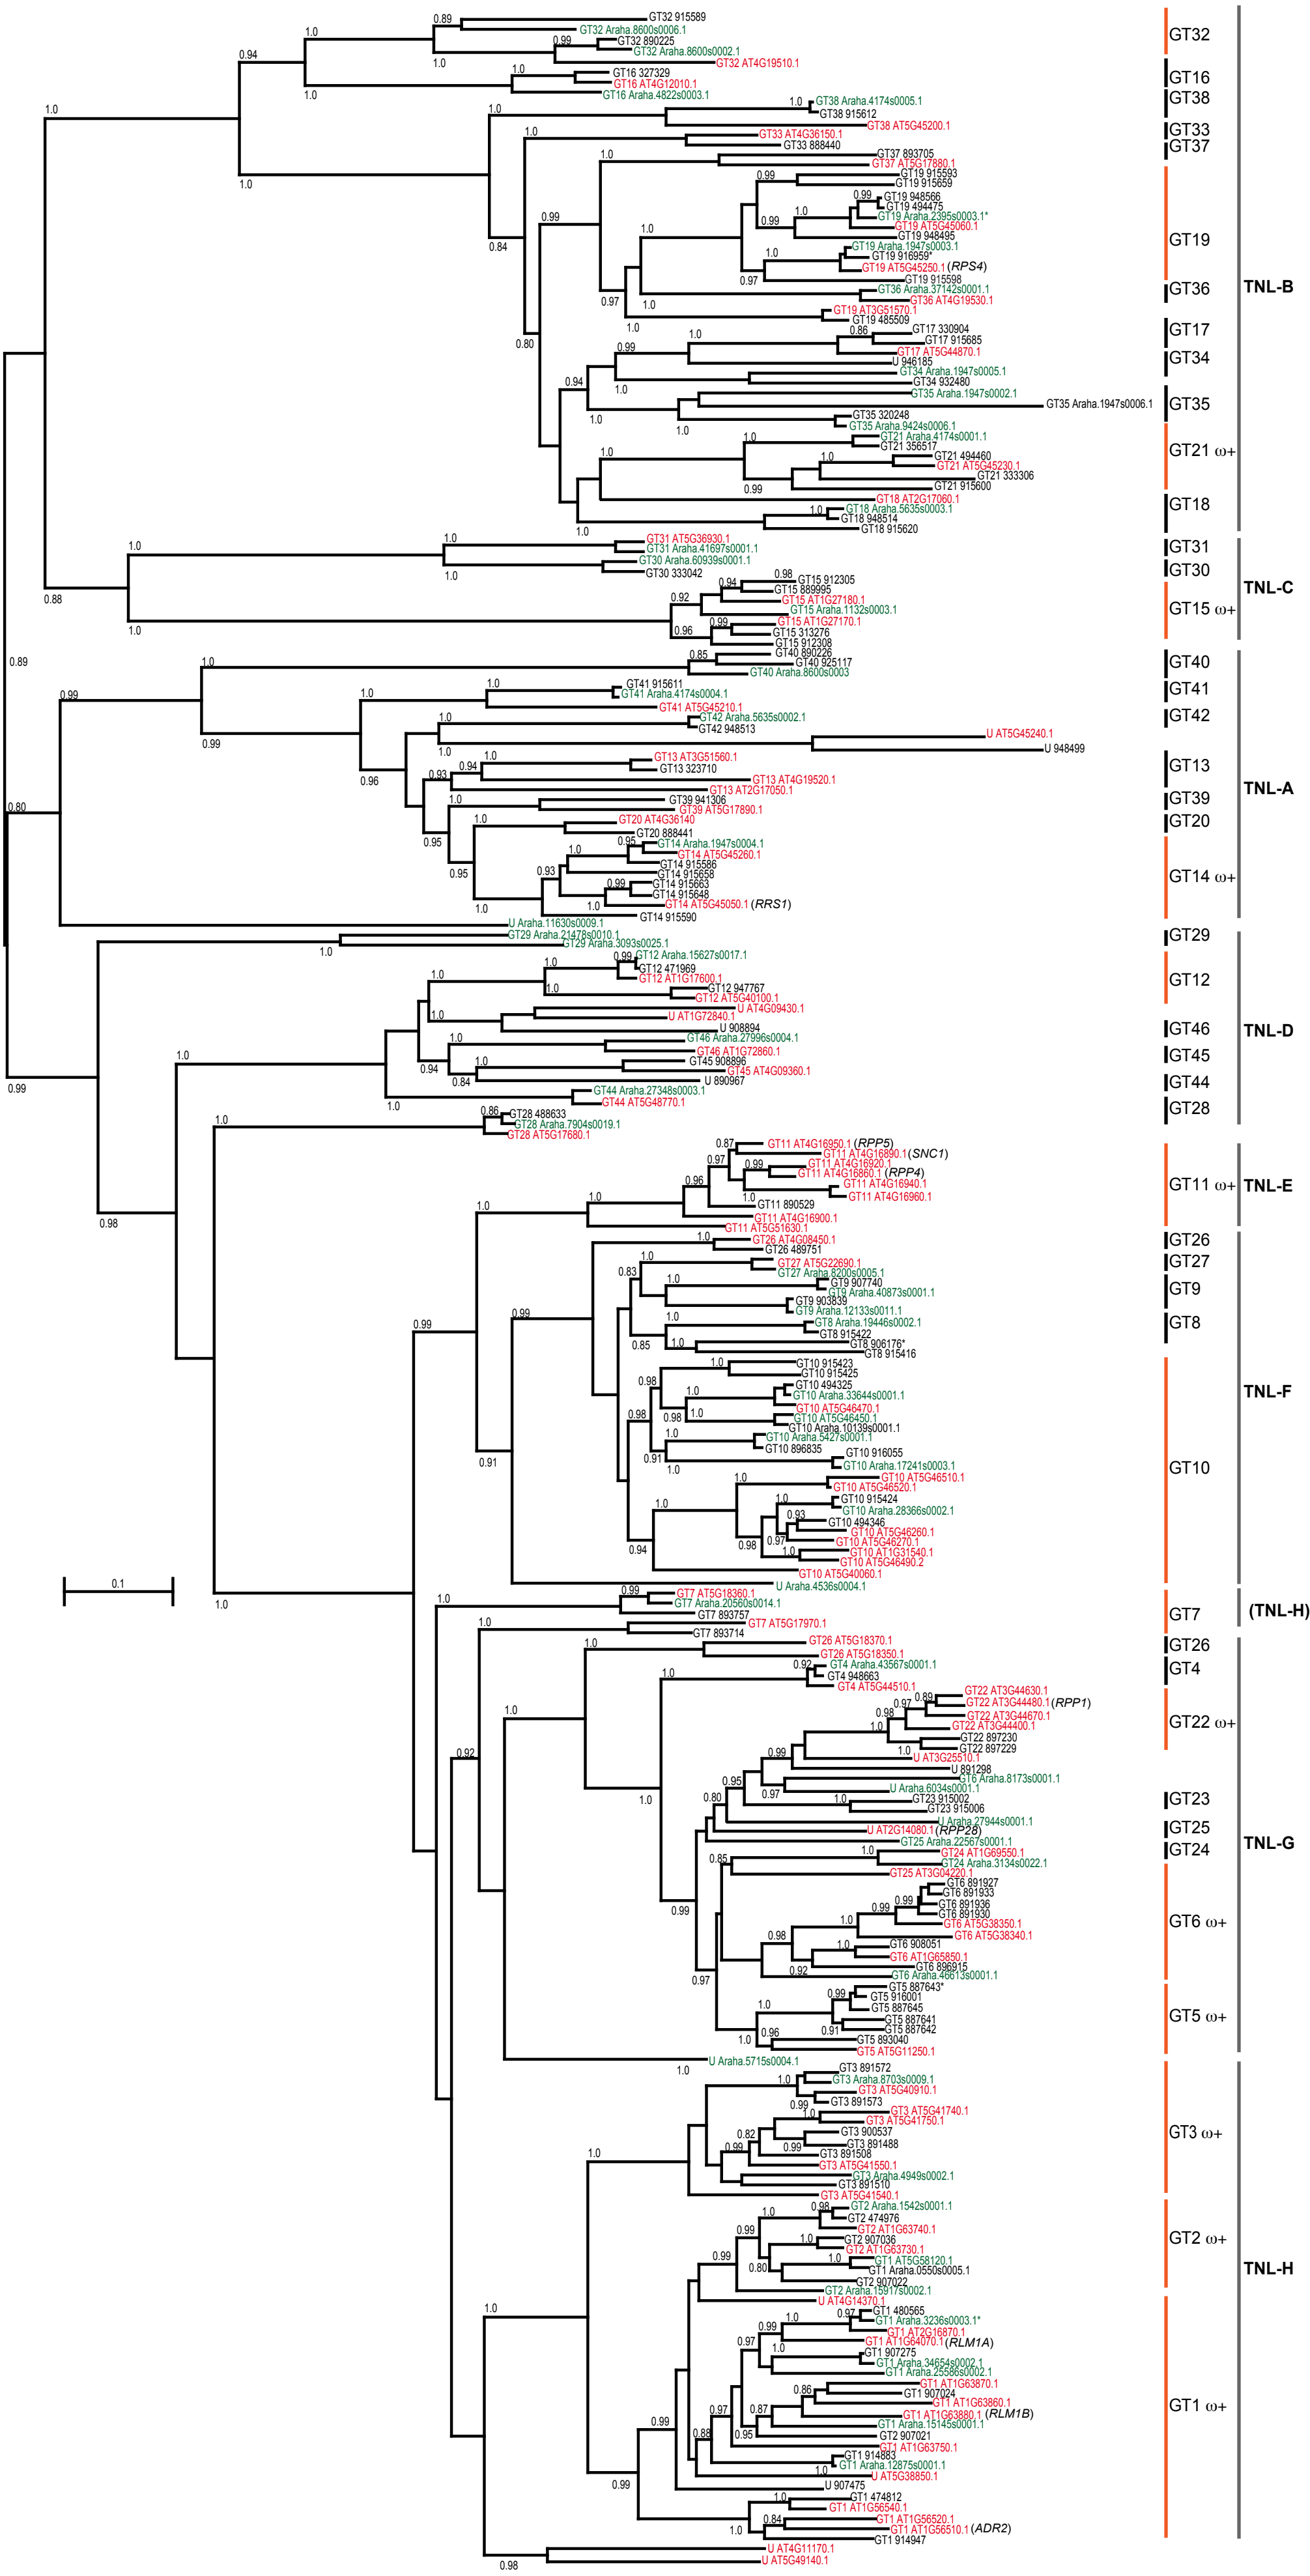

Supplement: 12862_2017_1099_MOESM2_ESM.pdf [file 12862_2017_1099_MOESM2_ESM.pdf]
