# Supplementary material for: Diversification of defensins and NLRs in Arabidopsis species by different evolutionary mechanisms
Source: PubMed Central journal article supplement (PMC5731061; doi:10.1186/s12862-017-1099-4), 2017-12-15
Supplement: 12862_2017_1099_MOESM11_ESM.pdf [file 12862_2017_1099_MOESM11_ESM.pdf]

| Alignment group | Gene ID          | Untreated pistils | Infected pistils | Untreated leaf | Infected leaf |
|-----------------|------------------|-------------------|------------------|----------------|---------------|
| GT1             | 907024           |                   |                  |                |               |
|                 | 907275           |                   |                  |                |               |
|                 | Araha.0550s0005  |                   |                  |                |               |
|                 | Araha.12875s0001 |                   |                  |                |               |
|                 | Araha.15145s0001 |                   |                  |                |               |
|                 | Araha.25586s0002 |                   |                  |                |               |
|                 | Araha.3236s0003  |                   |                  |                |               |
|                 | Araha.34654s0002 |                   |                  |                |               |
|                 | AT1G56510        |                   |                  |                |               |
|                 | AT1G56520        |                   |                  |                |               |
|                 | AT1G56540        |                   |                  |                |               |
|                 | AT1G63750        |                   |                  |                |               |
|                 | AT1G63860        |                   |                  |                |               |
|                 | AT1G63880        |                   |                  |                |               |
| AT2G16870       |                  |                   |                  |                |               |
| AT5G58120       |                  |                   |                  |                |               |
| GT2             | 474976           |                   |                  |                |               |
|                 | 907022           |                   |                  |                |               |
|                 | 907036           |                   |                  |                |               |
|                 | Araha.1542s0001  |                   |                  |                |               |
|                 | Araha.15917s0002 |                   |                  |                |               |
|                 | AT1G63730        |                   |                  |                |               |
| AT1G63740       |                  |                   |                  |                |               |
| GT3             | 891488           |                   |                  |                |               |
|                 | 891508           |                   |                  |                |               |
|                 | 891510           |                   |                  |                |               |
|                 | 891572           |                   |                  |                |               |
|                 | 900537           |                   |                  |                |               |
|                 | Araha.4949s0002  |                   |                  |                |               |
|                 | Araha.8703s0009  |                   |                  |                |               |
|                 | AT5G40910        |                   |                  |                |               |
| AT5G41550       |                  |                   |                  |                |               |
| AT5G41740       |                  |                   |                  |                |               |
| AT5G41750       |                  |                   |                  |                |               |
| GT4             | 948663           |                   |                  |                |               |
|                 | Araha.43567s0001 |                   |                  |                |               |
| AT5G44510       |                  |                   |                  |                |               |
| GT5             | 887645           |                   |                  |                |               |
|                 | 893040           |                   |                  |                |               |
| AT5G11250       |                  |                   |                  |                |               |
| GT6             | 896915           |                   |                  |                |               |
|                 | Araha.46613s0001 |                   |                  |                |               |
| Araha.8173s0001 |                  |                   |                  |                |               |
| AT5G38350       |                  |                   |                  |                |               |
| GT7             | 893757           |                   |                  |                |               |
|                 | Araha.20560s0014 |                   |                  |                |               |
| AT5G18360       |                  |                   |                  |                |               |
| GT8             | 915416           |                   |                  |                |               |
|                 | Araha.19446s0002 |                   |                  |                |               |
| GT9             | Araha.12133s0011 |                   |                  |                |               |
|                 | Araha.40873s0001 |                   |                  |                |               |
| GT10            | 494325           |                   |                  |                |               |
|                 | 494346           |                   |                  |                |               |
|                 | 896835           |                   |                  |                |               |
|                 | 915423           |                   |                  |                |               |
|                 | 915424           |                   |                  |                |               |
|                 | Araha.10139s0001 |                   |                  |                |               |
|                 | Araha.17241s0003 |                   |                  |                |               |
|                 | Araha.28366s0002 |                   |                  |                |               |
|                 | Araha.33644s0001 |                   |                  |                |               |
|                 | Araha.5427s0001  |                   |                  |                |               |
|                 | AT1G31540        |                   |                  |                |               |
|                 | AT5G40060        |                   |                  |                |               |
|                 | AT5G46260        |                   |                  |                |               |
|                 | AT5G46270        |                   |                  |                |               |
| AT5G46450       |                  |                   |                  |                |               |
| AT5G46470       |                  |                   |                  |                |               |
| AT5G46490       |                  |                   |                  |                |               |
| AT5G46510       |                  |                   |                  |                |               |
| AT5G46520       |                  |                   |                  |                |               |
| GT11            | 890529           |                   |                  |                |               |
|                 | AT4G16860        |                   |                  |                |               |
|                 | AT4G16890        |                   |                  |                |               |
|                 | AT4G16900        |                   |                  |                |               |
|                 | AT4G16920        |                   |                  |                |               |
|                 | AT4G16940        |                   |                  |                |               |
|                 | AT4G16950        |                   |                  |                |               |
|                 | AT4G16960        |                   |                  |                |               |
| AT5G51630       |                  |                   |                  |                |               |
| GT12            | 471969           |                   |                  |                |               |
|                 | 947767           |                   |                  |                |               |
|                 | Araha.15627s0017 |                   |                  |                |               |
|                 | AT1G17600        |                   |                  |                |               |
| AT5G40100       |                  |                   |                  |                |               |
| GT13            | 323710           |                   |                  |                |               |
|                 | AT4G19520        |                   |                  |                |               |
| GT14            | 915663           |                   |                  |                |               |
|                 | Araha.1947s0004  |                   |                  |                |               |
|                 | AT5G45050        |                   |                  |                |               |
| AT5G45260       |                  |                   |                  |                |               |
| GT15            | 313276           |                   |                  |                |               |
|                 | 912308           |                   |                  |                |               |
|                 | Araha.1132s0003  |                   |                  |                |               |
|                 | AT1G27170        |                   |                  |                |               |
| AT1G27180       |                  |                   |                  |                |               |
| GT16            | 327329           |                   |                  |                |               |
|                 | Araha.4822s0003  |                   |                  |                |               |
| AT4G12010       |                  |                   |                  |                |               |
| GT17            | 915685           |                   |                  |                |               |
|                 | AT5G44870        |                   |                  |                |               |
| GT18            | 915620           |                   |                  |                |               |
|                 | Araha.5635s0003  |                   |                  |                |               |
| GT19            | 485509           |                   |                  |                |               |
|                 | 915593           |                   |                  |                |               |
|                 | 916959           |                   |                  |                |               |
|                 | Araha.1947s0003  |                   |                  |                |               |
|                 | Araha.2395s0003  |                   |                  |                |               |
| AT5G45060       |                  |                   |                  |                |               |
| AT5G45250       |                  |                   |                  |                |               |
| GT20            | 888441           |                   |                  |                |               |
|                 | AT4G36140        |                   |                  |                |               |
| GT21            | 356517           |                   |                  |                |               |
|                 | 494460           |                   |                  |                |               |
| GT22            | 897230           |                   |                  |                |               |
|                 | AT3G44400        |                   |                  |                |               |
|                 | AT3G44480        |                   |                  |                |               |
|                 | AT3G44630        |                   |                  |                |               |
| AT3G44670       |                  |                   |                  |                |               |
| GT24            | Araha.3134s0022  |                   |                  |                |               |
|                 | AT1G69550        |                   |                  |                |               |
| GT25            | Araha.22567s0001 |                   |                  |                |               |
|                 | AT3G04220        |                   |                  |                |               |
| GT26            | AT5G18350        |                   |                  |                |               |
|                 | AT5G18370        |                   |                  |                |               |
| GT27            | Araha.8200s0005  |                   |                  |                |               |
|                 | AT5G22690        |                   |                  |                |               |
| GT28            | 488633           |                   |                  |                |               |
|                 | Araha.7904s0019  |                   |                  |                |               |
| GT29            | Araha.21478s0010 |                   |                  |                |               |
|                 | Araha.3093s0025  |                   |                  |                |               |
| GT30            | Araha.60939s0001 |                   |                  |                |               |
|                 | Araha.41697s0001 |                   |                  |                |               |
| AT5G36930       |                  |                   |                  |                |               |
| GT32            | 915589           |                   |                  |                |               |
|                 | Araha.8600s0002  |                   |                  |                |               |
|                 | Araha.8600s0006  |                   |                  |                |               |
|                 | AT4G19510        |                   |                  |                |               |
| GT33            | AT4G36150        |                   |                  |                |               |
|                 | 932480           |                   |                  |                |               |
| GT34            | Araha.1947s0005  |                   |                  |                |               |
|                 | 320248           |                   |                  |                |               |
| GT35            | Araha.1947s0002  |                   |                  |                |               |
|                 | Araha.1947s0006  |                   |                  |                |               |
|                 | Araha.9424s0006  |                   |                  |                |               |
| GT36            | Araha.37142s0001 |                   |                  |                |               |
|                 | AT4G19530        |                   |                  |                |               |
| GT37            | 893705           |                   |                  |                |               |
|                 | AT5G17880        |                   |                  |                |               |
| GT39            | 941306           |                   |                  |                |               |
|                 | AT5G17890        |                   |                  |                |               |
| GT40            | Araha.8600s0003  |                   |                  |                |               |
|                 | 948513           |                   |                  |                |               |
| GT42            | AT5G48770        |                   |                  |                |               |
|                 | 908896           |                   |                  |                |               |
| GT44            | AT5G48770        |                   |                  |                |               |
|                 | 908896           |                   |                  |                |               |
| GT45            | AT1G72860        |                   |                  |                |               |
|                 | AT1G72860        |                   |                  |                |               |
| Ungrouped       | 890967           |                   |                  |                |               |
|                 | 891298           |                   |                  |                |               |
|                 | 894148           |                   |                  |                |               |
|                 | 908894           |                   |                  |                |               |
|                 | 946185           |                   |                  |                |               |
|                 | 948499           |                   |                  |                |               |
|                 | Araha.27944s0001 |                   |                  |                |               |
|                 | Araha.5715s0004  |                   |                  |                |               |
|                 | Araha.6034s0001  |                   |                  |                |               |
|                 | AT1G72840        |                   |                  |                |               |
|                 | AT2G14080        |                   |                  |                |               |
|                 | AT3G25510        |                   |                  |                |               |
|                 | AT4G09430        |                   |                  |                |               |
|                 | AT4G11170        |                   |                  |                |               |
|                 | AT4G14370        |                   |                  |                |               |
| AT5G38850       |                  |                   |                  |                |               |
| AT5G45240       |                  |                   |                  |                |               |
